# Supplementary material for: Super-Resolution Imaging with Ultrasound for Visualization of the Renal Microvasculature in Rats Before and After Renal Ischemia: A Pilot Study
Source: MDPI journal article supplement (doi:10.3390/diagnostics10110862), 2020-10-22
Supplement: s1 [file s1]

## Supplementary material

# Super-Resolution Imaging with Ultrasound for Visualization of the Renal Microvasculature in Rats Before and After Renal Ischemia: A Pilot Study

## Content

|           |                                                                                     |
|-----------|-------------------------------------------------------------------------------------|
| Pages 1-4 | Super-resolution and power Doppler images of 10 rats.                               |
| Page 5    | Experimental data (rat weight, blood pressure, track number and microbubble count). |
| Page 6-10 | Image assessment. Assignment descriptions and answers from assessors.               |
| Page 11   | Histology assessment results.                                                       |

## 1. Supplementary Figures

Super-resolution images before and after renal artery clamping

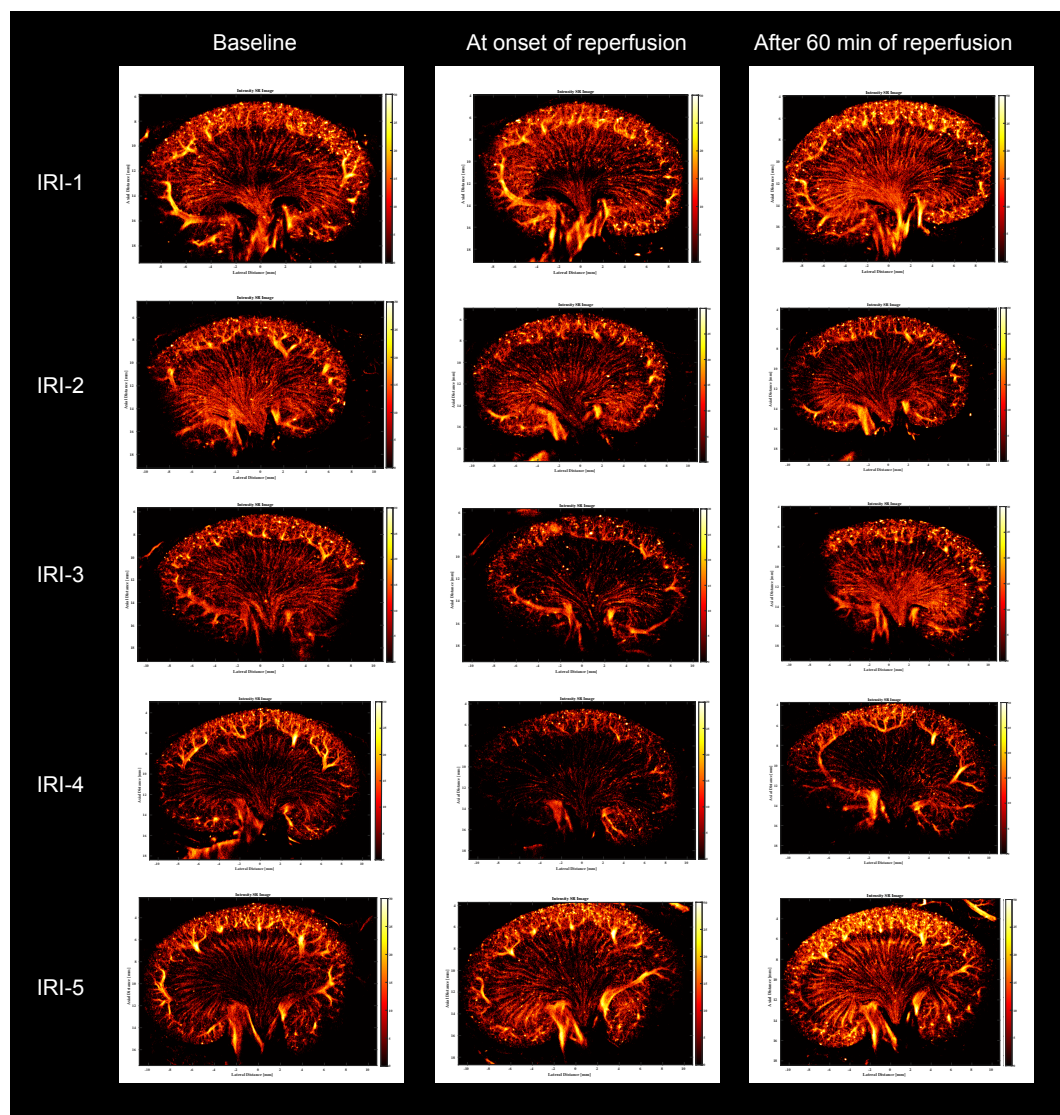

Figure S1. Super-resolution images of five rats before and after clamping the renal artery.

# Super-resolution images before and after renal vein clamping

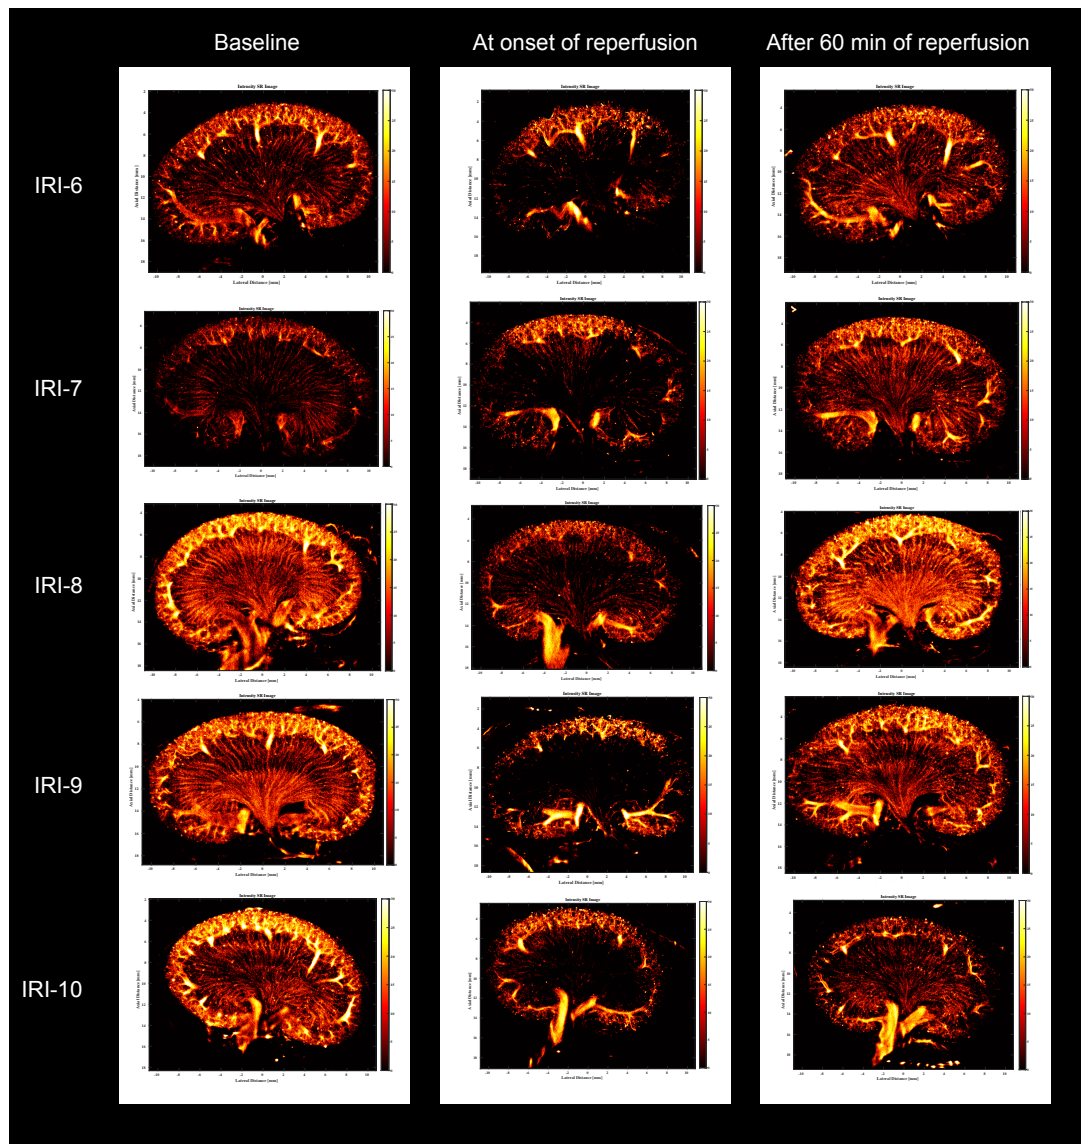

**Figure S2.** Super-resolution images of five rats before and after clamping the renal vein.



Power Doppler images before and after renal artery clamping

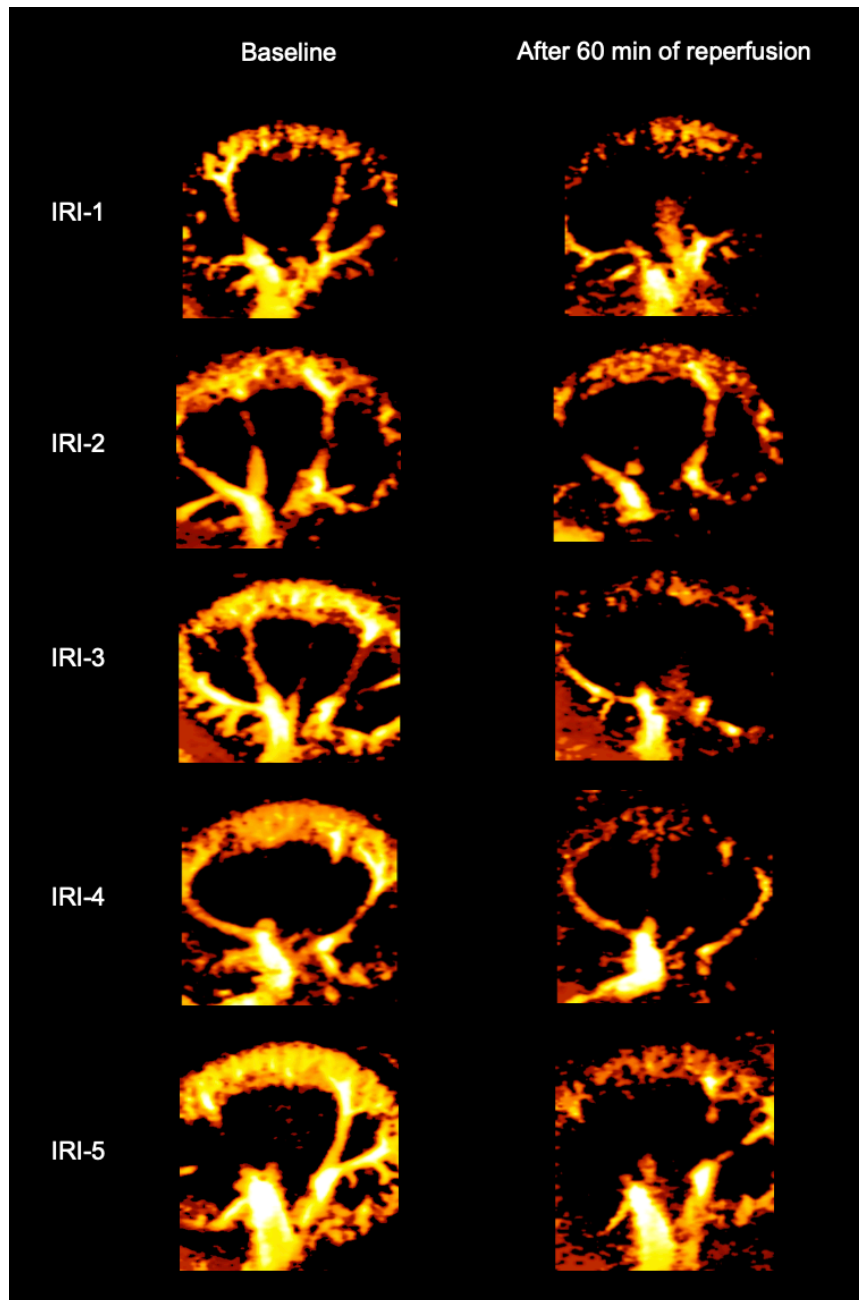

**Figure S3.** Power Doppler images of the five rats that had the renal artery clamped.

Power Doppler images before and after renal vein clamping

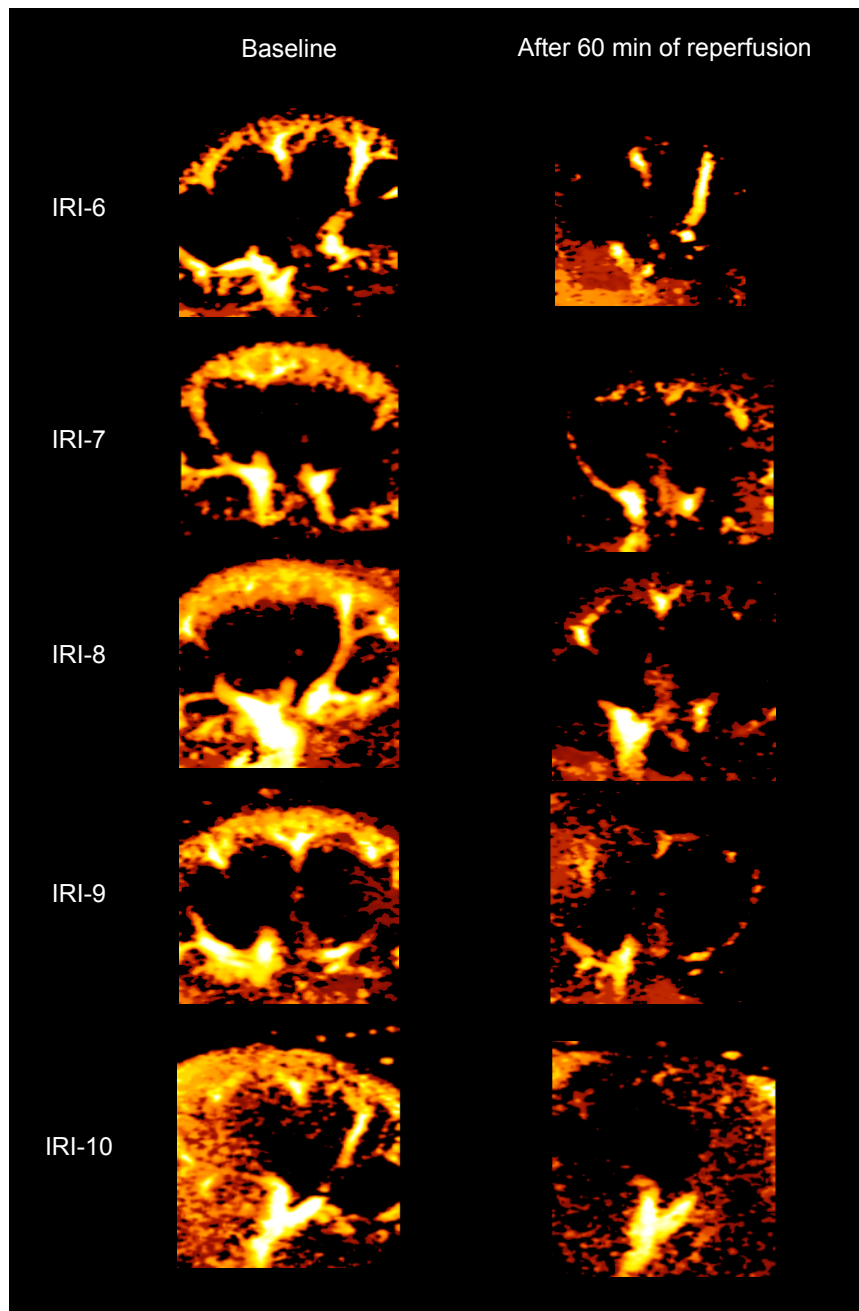

**Figure S4.** Power Doppler images of the five rats that had the renal vein clamped.

## 2. Supplementary Data

**Table S1.** Experimental data

|                     |                 |            | Mean Arterial Blood Pressure (mmHg) |                   |                      | Number of tracks (total) |                   |                    | Number of microbubbles (per frame) |                   |                    |
|---------------------|-----------------|------------|-------------------------------------|-------------------|----------------------|--------------------------|-------------------|--------------------|------------------------------------|-------------------|--------------------|
|                     |                 |            | Average during the 10 min scan      |                   |                      |                          |                   |                    |                                    |                   |                    |
| Animal ID           | Intervention    | Weight (g) | Baseline                            | Onset reperfusion | 60 min reperfusion   | Baseline                 | Onset reperfusion | 60 min reperfusion | Baseline                           | Onset reperfusion | 60 min reperfusion |
| IRI-1 <sup>#</sup>  | artery clamp    | 343        | 139.61                              | 145.92            | 138.20               | 204,594                  | 223,941           | 287,546            | 65                                 | 73                | 89                 |
| IRI-2               | artery clamp    | 309        | 106.59                              | 102.77            | 86.08                | 181,892                  | 172,895           | 161,938            | 60                                 | 56                | 51                 |
| IRI-3               | artery clamp    | 305        | 137.39                              | 133.52            | 118.25               | 143,654                  | 110,275           | 187,186            | 52                                 | 38                | 66                 |
| IRI-4               | artery clamp    | 357        | 100.83                              | 103.93            | 104.08               | 168,109                  | 84,186            | 142,952            | 59                                 | 29                | 50                 |
| IRI-5               | artery clamp    | 416        | 93.60                               | 113.23            | 97.66                | 170,834                  | 214,194           | 315,920            | 64                                 | 74                | 104                |
| IRI-6               | vein clamp      | 414        | 94.03                               | 94.90             | <i>missing data*</i> | 198,735                  | 103,098           | 212,018            | 70                                 | 36                | 70                 |
| IRI-7               | vein clamp      | 355        | 111.24                              | 120.63            | 114.26               | 95,008                   | 113,651           | 212,340            | 34                                 | 39                | 70                 |
| IRI-8               | vein clamp      | 290        | 94.32                               | 112.96            | 119.03               | 343,939                  | 134,740           | 355,069            | 117                                | 46                | 120                |
| IRI-9               | vein clamp      | 291        | 124.56                              | 124.15            | 116.22               | 307,999                  | 145,214           | 263,802            | 106                                | 55                | 89                 |
| IRI-10              | vein clamp      | 293        | 87.01                               | 66.79             | 58.47                | 320,375                  | 135,548           | 174,711            | 108                                | 45                | 54                 |
| Histology control 1 | non             | 254        |                                     |                   |                      |                          |                   |                    |                                    |                   |                    |
| Histology control 2 | non             | 282        |                                     |                   |                      |                          |                   |                    |                                    |                   |                    |
| Histology control 3 | non             | 273        |                                     |                   |                      |                          |                   |                    |                                    |                   |                    |
| MRI specimen        | MRI preparation | 345        |                                     |                   |                      |                          |                   |                    |                                    |                   |                    |
| Pre-trial rat       | non             | 295        |                                     |                   |                      |                          |                   |                    |                                    |                   |                    |

<sup>#</sup>IRI = ischemia-reperfusion injury

\*unknown error in the blood pressure recording.

**Table S2.** Image assessment, assignment 1A<sup>#</sup>

| Animal ID* | Assessor 1 |       |        | Assessor 2 |       |        | Assessor 3 |       |        | Assessor 4 |       |        | Assessor 5 |       |        | Assessor 6 |       |        | Correct   |       |        |
|------------|------------|-------|--------|------------|-------|--------|------------|-------|--------|------------|-------|--------|------------|-------|--------|------------|-------|--------|-----------|-------|--------|
|            | Base-line  | Onset | 60 min | Base-line  | Onset | 60 min | Base-line  | Onset | 60 min | Base-line  | Onset | 60 min | Base-line  | Onset | 60 min | Base-line  | Onset | 60 min | Base-line | Onset | 60 min |
| IRI-9      | 3          | 1     | 2      | 3          | 1     | 2      | 2          | 1     | 3      | 3          | 1     | 2      | 3          | 1     | 2      | 3          | 1     | 2      | 3         | 1     | 2      |
| IRI-3      | 4          | 6     | 5      | 4          | 6     | 5      | 4          | 6     | 5      | 5          | 6     | 4      | 5          | 6     | 4      | 5          | 6     | 4      | 4         | 6     | 5      |
| IRI-6      | 9          | 8     | 7      | 9          | 8     | 7      | 7          | 8     | 9      | 9          | 8     | 7      | 9          | 8     | 7      | 7          | 8     | 9      | 7         | 8     | 9      |
| IRI-8      | 10         | 11    | 12     | 10         | 11    | 12     | 10         | 11    | 12     | 10         | 11    | 12     | 10         | 11    | 12     | 10         | 11    | 12     | 10        | 11    | 12     |
| IRI-5      | 13         | 15    | 14     | 13         | 15    | 14     | 14         | 15    | 13     | 13         | 15    | 14     | 13         | 15    | 14     | 13         | 15    | 14     | 15        | 14    | 13     |
| IRI-1      | 16         | 18    | 17     | 16         | 17    | 18     | 16         | 18    | 17     | 16         | 18    | 17     | 16         | 18    | 17     | 16         | 17    | 18     | 17        | 18    | 16     |
| IRI-7      | 20         | 21    | 19     | 20         | 21    | 19     | 20         | 21    | 19     | 20         | 21    | 19     | 20         | 21    | 19     | 20         | 21    | 19     | 19        | 21    | 20     |
| IRI-10     | 23         | 22    | 24     | 23         | 22    | 24     | 23         | 22    | 24     | 23         | 22    | 24     | 23         | 22    | 24     | 23         | 22    | 24     | 23        | 22    | 24     |
| IRI-4      | 27         | 25    | 26     | 27         | 25    | 26     | 26         | 25    | 27     | 27         | 25    | 26     | 27         | 25    | 26     | 26         | 25    | 27     | 27        | 25    | 26     |
| IRI-2      | 30         | 29    | 28     | 30         | 28    | 29     | 29         | 28    | 30     | 30         | 29    | 28     | 30         | 29    | 28     | 30         | 29    | 28     | 30        | 28    | 29     |

# The six assessors completed assignment 1A and 2A before receiving assignment 1B and 2B.

\*Animal ID not known to assessors. Green: Correct answer. Red: Incorrect answer.

The scans from each animal was presented in random order. The scans from the first animal were 1-3, next animal 4-6 etc. The six assessors were presented with the following text: "Below are 10 rat kidneys, each with three super-resolution images in random order. Each kidney was scanned in three different states: 1) baseline (healthy state). 2) at the onset of reperfusion after 45 min of clamping either the renal artery (n=5) or renal vein (n=5) (assumption of low renal blood flow immediately after removal of the clamp). 3) after 60 minutes of reperfusion (assumption that the renal blood flow has returned in some degree). Your task is to assign the images from each rat into three groups based on similarity of the images. Then, you assign the 10 grouped images to either baseline, onset of reperfusion or 60 minutes of reperfusion."



**Table S3.** Assignment 1A, interobserver agreement

| Intervention | True category | Image number | Assessed category |       |        |
|--------------|---------------|--------------|-------------------|-------|--------|
|              |               |              | Baseline          | Onset | 60 Min |
| Vein clamp   | Onset         | 1            | 0                 | 6     | 0      |
|              | 60 Min        | 2            | 1                 | 0     | 5      |
|              | Baseline      | 3            | 5                 | 0     | 1      |
| Artery clamp | Baseline      | 4            | 3                 | 0     | 3      |
|              | 60 Min        | 5            | 3                 | 0     | 3      |
|              | Onset         | 6            | 0                 | 6     | 0      |
| Vein clamp   | Baseline      | 7            | 2                 | 0     | 4      |
|              | Onset         | 8            | 0                 | 6     | 0      |
|              | 60 Min        | 9            | 4                 | 0     | 2      |
| Vein clamp   | Baseline      | 10           | 6                 | 0     | 0      |
|              | Onset         | 11           | 0                 | 6     | 0      |
|              | 60 Min        | 12           | 0                 | 0     | 6      |
| Artery clamp | 60 Min        | 13           | 5                 | 0     | 1      |
|              | Onset         | 14           | 1                 | 0     | 5      |
|              | Baseline      | 15           | 0                 | 6     | 0      |
| Artery clamp | 60 Min        | 16           | 6                 | 0     | 0      |
|              | Baseline      | 17           | 0                 | 2     | 4      |
|              | Onset         | 18           | 0                 | 4     | 2      |
| Vein clamp   | Baseline      | 19           | 0                 | 0     | 6      |
|              | 60 Min        | 20           | 6                 | 0     | 0      |
|              | Onset         | 21           | 0                 | 6     | 0      |
| Vein clamp   | Onset         | 22           | 0                 | 6     | 0      |
|              | Baseline      | 23           | 6                 | 0     | 0      |
|              | 60 Min        | 24           | 0                 | 0     | 6      |
| Artery clamp | Onset         | 25           | 0                 | 6     | 0      |
|              | 60 Min        | 26           | 2                 | 0     | 4      |
|              | Baseline      | 27           | 4                 | 0     | 2      |
| Artery clamp | Onset         | 28           | 0                 | 2     | 4      |
|              | 60 Min        | 29           | 1                 | 4     | 1      |
|              | Baseline      | 30           | 5                 | 0     | 1      |

Assessed categories were inserted at the Online Kappa Calculator, available online: <http://justusrandolph.net/kappa/> (accessed 27 May 2020).

Results: Percent overall agreement = 73.33%. Fixed-marginal kappa = 0.60.

95% CI for fixed-marginal kappa [0.50, 0.70].

**Table S4.** Image assessment, assignment 1B

| Assessor 1 |      | Assessor 2 |      | Assessor 3 |      | Assessor 4 |      | Assessor 5 |      | Assessor 6 |      | Correct |      |
|------------|------|------------|------|------------|------|------------|------|------------|------|------------|------|---------|------|
| Artery     | Vein | Artery     | Vein | Artery     | Vein | Artery     | Vein | Artery     | Vein | Artery     | Vein | Artery  | Vein |
| A          | B    | A          | B    | A          | B    | A          | B    | A          | B    | A          | B    | A       | B    |
| C          | D    | C          | D    | C          | D    | C          | D    | C          | D    | C          | D    | C       | E    |
| E          | I    | G          | E    | G          | E    | G          | E    | F          | E    | E          | G    | D       | F    |
| H          | F    | H          | F    | H          | F    | H          | F    | G          | I    | F          | I    | G       | H    |
| G          | J    | J          | I    | J          | I    | J          | I    | H          | J    | H          | J    | J       | I    |

Green: Correct answer. Red: Incorrect answer. The scans from each animal was presented in the correct order (baseline – onset of reperfusion – after 60 min of reperfusion).

The animals were identified by a capital letter A-J (as shown in the table to the right).

The six assessors were presented with the following text: “Five of the kidneys below had the renal artery clamped for 45 minutes, and the other five kidneys had the renal vein clamped for 45 minutes. The first image was obtained at baseline, the second was obtained at the onset of reperfusion and the third was obtained after 60 minutes of reperfusion. According to the literature, the vein clamp causes the severest tissue damage. Please group the 10 kidneys (A-J) into the five you believe had the artery clamped, and the five you believe had the vein clamped.”

| Image number | Animal ID |
|--------------|-----------|
| A            | IRI-5     |
| B            | IRI-6     |
| C            | IRI-1     |
| D            | IRI-4     |
| E            | IRI-7     |
| F            | IRI-9     |
| G            | IRI-3     |
| H            | IRI-8     |
| I            | IRI-10    |
| J            | IRI-2     |

**Table S5.** Image assessment, assignment 2A

| Animal<br>ID* | Image<br>number | Assessor 1 |        | Assessor 2 |        | Assessor 3 |        | Assessor 4 |        | Assessor 5 |        | Assessor 6 |        | Correct  |        |
|---------------|-----------------|------------|--------|------------|--------|------------|--------|------------|--------|------------|--------|------------|--------|----------|--------|
|               |                 | Baseline   | 60 min | Baseline   | 60 min | Baseline   | 60 min | Baseline   | 60 min | Baseline   | 60 min | Baseline   | 60 min | Baseline | 60 min |
| IRI-5         | A               | 2          | 1      | 2          | 1      | 2          | 1      | 2          | 1      | 2          | 1      | 2          | 1      | 2        | 1      |
| IRI-4         | B               | 1          | 2      | 1          | 2      | 1          | 2      | 1          | 2      | 1          | 2      | 1          | 2      | 1        | 2      |
| IRI-10        | C               | 1          | 2      | 1          | 2      | 1          | 2      | 1          | 2      | 1          | 2      | 1          | 2      | 1        | 2      |
| IRI-2         | D               | 1          | 2      | 1          | 2      | 1          | 2      | 1          | 2      | 1          | 2      | 1          | 2      | 1        | 2      |
| IRI-6         | E               | 2          | 1      | 2          | 1      | 2          | 1      | 2          | 1      | 2          | 1      | 2          | 1      | 2        | 1      |
| IRI-7         | F               | 1          | 2      | 1          | 2      | 1          | 2      | 1          | 2      | 1          | 2      | 1          | 2      | 1        | 2      |
| IRI-1         | G               | 2          | 1      | 2          | 1      | 2          | 1      | 2          | 1      | 2          | 1      | 2          | 1      | 2        | 1      |
| IRI-8         | H               | 1          | 2      | 1          | 2      | 1          | 2      | 1          | 2      | 1          | 2      | 1          | 2      | 1        | 2      |
| IRI-3         | I               | 2          | 1      | 2          | 1      | 2          | 1      | 2          | 1      | 2          | 1      | 2          | 1      | 2        | 1      |
| IRI-9         | J               | 2          | 1      | 2          | 1      | 2          | 1      | 2          | 1      | 2          | 1      | 2          | 1      | 2        | 1      |

\*Animal ID not known to assessors. Green: Correct answer. Red: Incorrect answer.

The scans from each animal was presented in the random order. The animals were identified by a capital letter A-J (as shown in the left side of the table).

The six assessors were presented with the following text: "The 10 kidneys were also scanned with power Doppler before and after clamping of the renal artery or renal vein. Please group the 20 scans into the 10 baseline scans and the 10 scans after 60 minutes of reperfusion according to the degree of power doppler signal, based on the following information: According to the literature, the renal blood flow is reduced after ischemia-reperfusion. Please name scans A1 and A2 etc."

**Table S6.** Image assessment, assignment 2B

| Assessor 1 |      | Assessor 2 |      | Assessor 3 |      | Assessor 4 |      | Assessor 5 |      | Assessor 6 |      | Correct |      |
|------------|------|------------|------|------------|------|------------|------|------------|------|------------|------|---------|------|
| Artery     | Vein | Artery     | Vein | Artery     | Vein | Artery     | Vein | Artery     | Vein | Artery     | Vein | Artery  | Vein |
| B          | A    | C          | A    | C          | A    | B          | A    | B          | A    | A          | B    | B       | A    |
| C          | F    | D          | B    | D          | B    | C          | F    | C          | F    | D          | C    | C       | F    |
| D          | H    | E          | F    | E          | F    | D          | G    | D          | H    | E          | F    | D       | G    |
| E          | I    | I          | G    | I          | G    | E          | H    | E          | I    | I          | G    | E       | H    |
| G          | J    | J          | H    | J          | H    | I          | J    | G          | J    | J          | H    | I       | J    |

Green: Correct answer. Red: Incorrect answer. The scans from each animal was presented in the correct order (baseline – after 60 min of reperfusion).

The animals were identified by a capital letter A-J (as shown in the table to the right).

The six assessors were presented with the following text: “Five of the kidneys below had the renal artery clamped for 45 minutes, and the other five kidneys had the renal vein clamped for 45 minutes. The first image was obtained at baseline, the second was obtained after 60 minutes of reperfusion. According to the literature, the vein clamp causes the severest tissue damage. Please group the 10 kidneys (A-J) into the five you believe had the artery clamped, and the five you believe had the vein clamped. They are not in the same order as assignment 1B. Do not compare the images to the images in assignment 1B.”

| Image number | Animal ID |
|--------------|-----------|
| A            | IRI-10    |
| B            | IRI-3     |
| C            | IRI-1     |
| D            | IRI-2     |
| E            | IRI-5     |
| F            | IRI-9     |
| G            | IRI-8     |
| H            | IRI-6     |
| I            | IRI-4     |
| J            | IRI-7     |



**Table S7.** Assessment of hematoxylin and eosin staining

|              | Assessment | Correct |
|--------------|------------|---------|
| Vein clamp   | A          | A       |
|              | G          | G       |
|              | L          | L       |
|              | E          | E       |
|              | I          | I       |
|              | O          |         |
| Artery clamp | H          | H       |
|              | M          | M       |
|              | J          | J       |
|              | P          | B       |
|              | C          | O       |
| Sham control | B          | D       |
|              | D          | N       |
|              | N          | F       |
|              | F          | K       |
|              | K          | P       |
|              |            | N       |

Green: Correct answer. Red: Incorrect answer. Specimens not digitalized.
